# Supplementary material for: Metastable micelles and true liquid crystal behaviour of newly designed “cataniomeric” surfactants
Source: Royal Society of Chemistry journal article supplement (doi:10.1039/c2sm27489b), 2013-01-01
Supplement: c2sm27489b.pdf [file c2sm27489b.pdf]

Supporting Information

**Metastable micelles and true liquid crystal behaviour of newly designed "catanionic" surfactants**

Mélanie Emo, Marie-José Stébé, Jean-Luc Blin and Andreea Pasc\*

**Table S1.** X-Ray Diffraction Data for a 54.6% OOJ sample at 10°C indexed to the space group *Im3m* with a lattice parameter  $a = 7.4$  nm

| <b>hkl</b> | <b><math>(h^2+k^2+l^2)^{1/2}</math></b> | <b><math>d_{obs}</math> (nm)</b> | <b><math>d_{cal}</math> (nm)</b> | <b><math>I_{obs}^*</math></b> |
|------------|-----------------------------------------|----------------------------------|----------------------------------|-------------------------------|
| 110        | $\sqrt{2}$                              | 5.2                              | 5.2                              | vvs                           |
| 200        | $\sqrt{4}$                              | 3.7                              | 3.7                              | s                             |
| 211        | $\sqrt{6}$                              | 3.0                              | 3.0                              | s                             |

\*  $I_{obs}$  are the observed intensities, which are ranged from vvs (extremely strong) to s (strong).

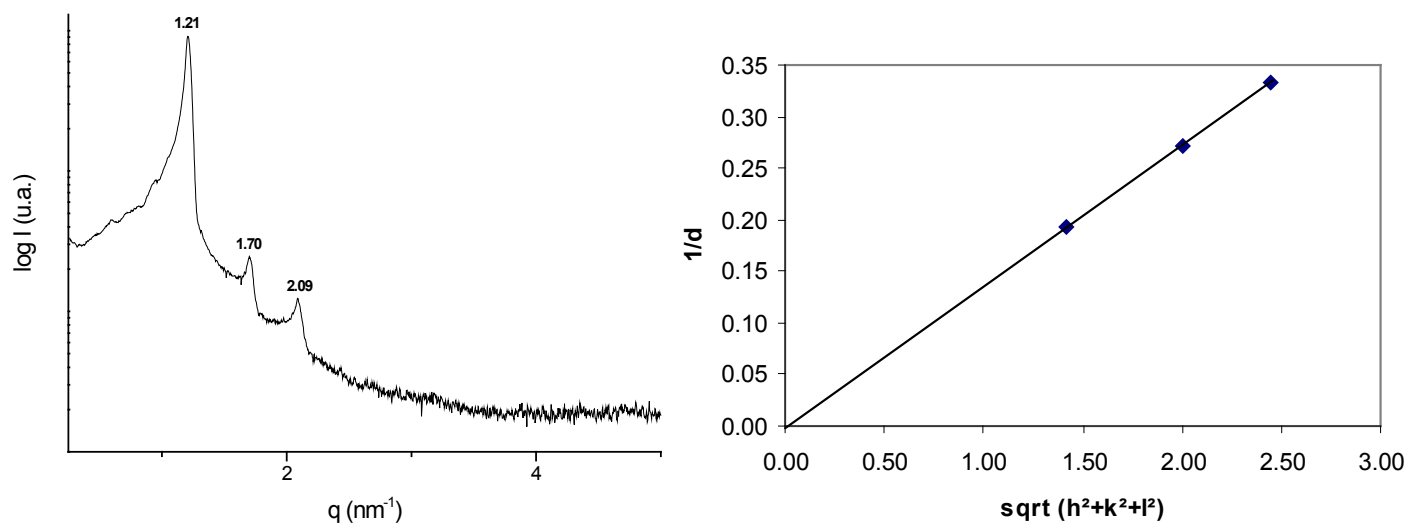

**Figure S1.** SAXS diffraction patterns obtained from a 54.6% OOJ sample at 10°C (left) and the plot of the reciprocal d spacing ( $1/d_{hkl}$ ) of the reflections observed (right).

**Table S2.** X-Ray Diffraction Data for a 40.0% SSJ sample at 20°C indexed to the space group *Fm3m* with a lattice parameter  $a = 10.7$  nm

| <b>hkl</b> | <b><math>(h^2+k^2+l^2)^{1/2}</math></b> | <b><math>d_{obs}</math> (nm)</b> | <b><math>d_{cal}</math> (nm)</b> | <b><math>I_{obs}^*</math></b> |
|------------|-----------------------------------------|----------------------------------|----------------------------------|-------------------------------|
| 111        | $\sqrt{3}$                              | 6.2                              | 6.2                              | vs                            |
| 200        | $\sqrt{4}$                              | 5.4                              | 5.4                              | m                             |
| 220        | $\sqrt{8}$                              | 3.8                              | 3.8                              | s                             |
| 311        | $\sqrt{11}$                             | 3.2                              | 3.2                              | m                             |

\*  $I_{obs}$  are the observed intensities, which are ranged from vs (very strong) to m (medium).

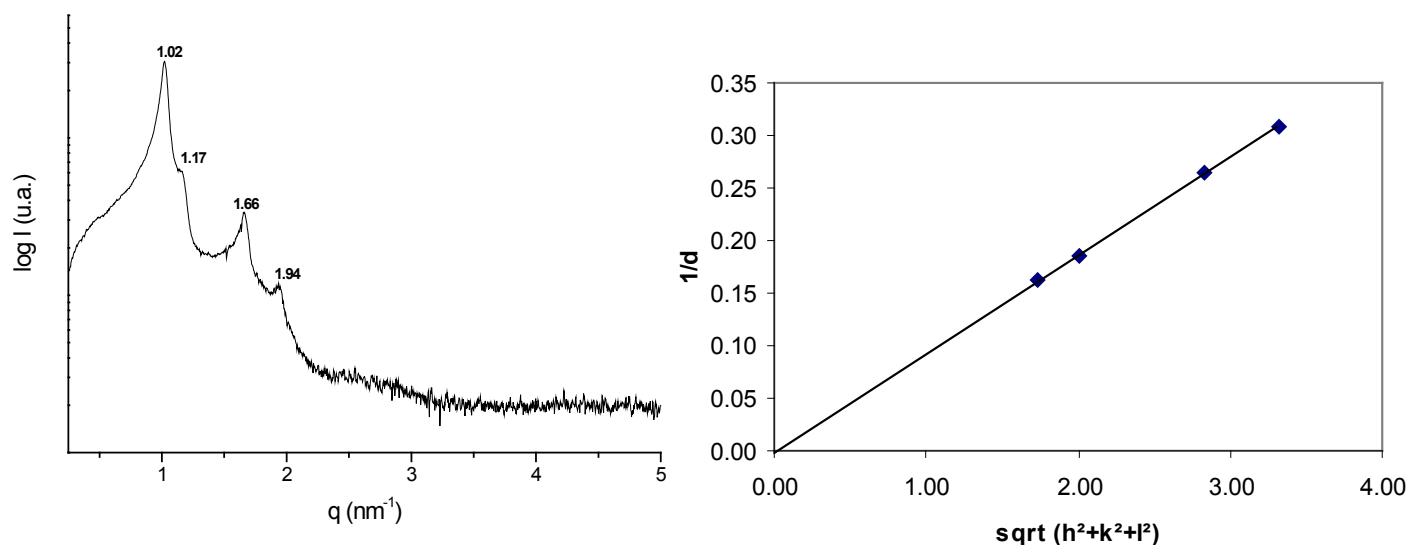

**Figure S2.** SAXS diffraction patterns obtained from a 40.0% SSJ sample at 20°C (left) and the plot of the reciprocal d spacing ( $1/d_{hkl}$ ) of the reflections observed (right).

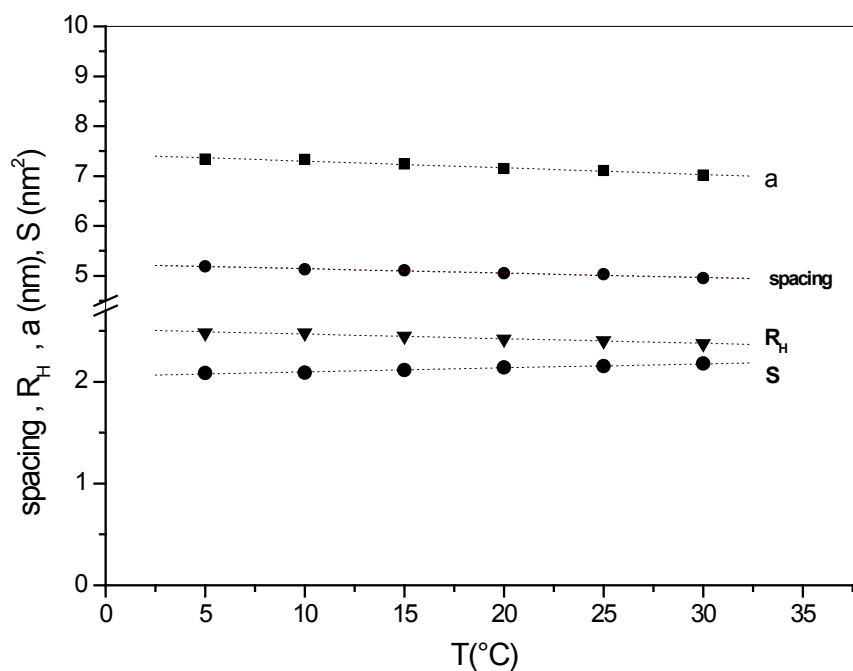

**Figure S3.** Variation of the d spacing and of the structure parameters of the  $Im3m$  cubic phase of 47 wt% MOJ as a function of the temperature

**Table S3.** Molar volumes of the hydrophobic part of the surfactant,  $V_B$  and of the surfactant  $V_S$  for all studied systems. (considering  $\rho_{EO} = 1.13$ ,  $\rho_{alkyl} = 0.9$  and  $\rho_{PPO} = 1$ )

|     | $V_B$  | $V_S$ |
|-----|--------|-------|
| LMJ | 944.4  | 1400  |
| MMJ | 975.6  | 1428  |
| LOJ | 1004.4 | 1454  |
| MOJ | 1035.6 | 1482  |
| MSJ | 1037.8 | 1484  |
| OOJ | 1095.6 | 1536  |
| SOJ | 1097.8 | 1538  |
| SSJ | 1100.0 | 1540  |
